# Supplementary material for: Mathematical modeling of transdermal delivery of topical drug formulations in a dynamic microfluidic diffusion chamber in health and disease
Source: PubMed Central journal article supplement (PMC11008853; doi:10.1371/journal.pone.0299501), 2024-04-11
Supplement: pone.0299501.s001.pdf [file pone.0299501.s001.pdf]

**S1 Table.**

| Case                                      | Figure | $k_{in}$ | $k_d$      | $k_c$     | $k_{out}$   | $V_{min}$ |
|-------------------------------------------|--------|----------|------------|-----------|-------------|-----------|
| caffeine 6hr                              | 4.A    | 7.4371   | 0.0336     | 3.3778    | 0.0293      | 0.0066    |
| caffeine 6hr 32 °C                        | 4.B    | 11.8667  | 0.0319     | 3.6637    | 0.0193      | 0.0048    |
| caffeine 12hr                             | 5      | 9.2316   | 0.0198     | 2.0409    | 4.2272E-05  | 0.0449    |
| 2% dexamethasone                          | 6.A    | 874.9814 | 3.4005E-05 | 0.2219    | 3.9239E-05  | 0.0935    |
| 2% piroxicam                              | 6.B    | 821.8726 | 1.2034E-05 | 0.37762   | 1.58662E-05 | 0.0392    |
| 2% indomethacin                           | 6.C    | 111.8016 | 6.457E-04  | 0.2690    | 6.4284E-04  | 0.1383    |
| 2% diclofenac                             | 6.D    | 52.0705  | 0.0279     | 0.3681    | 0.2231      | 0.0202    |
| psoriasis WT-VAZ-24                       | 8.A    | 3.6499   | 0.1206     | 30.6461   | 0.3365      | 0.0216    |
| psoriasis WT-VAZ-96                       | 8.B    | 3.1878   | 0.2150     | 261.0848  | 0.2207      | 0.0071    |
| psoriasis WT-IMQ-24                       | 8.C    | 10.0399  | 0.0272     | 3.1361    | 3.0377E-04  | 0.0081    |
| psoriasis WT-IMQ-96                       | 8.D    | 7.5925   | 0.0637     | 7.4099    | 3.4593E-05  | 0.0222    |
| contact dermatitis<br>C57BL-6J-WT-ACETONE | 10.A   | 0.5846   | 1.8494     | 1017.2059 | 7.3805E-04  | 0.0954    |
| contact dermatitis<br>C57BL-6J-WT-TNCB    | 10.C   | 1.1352   | 0.0347     | 9.0611    | 0.1236      | 0.0406    |
