# Supplementary material for: Mathematical modeling of transdermal delivery of topical drug formulations in a dynamic microfluidic diffusion chamber in health and disease
Source: PubMed Central journal article supplement (PMC11008853; doi:10.1371/journal.pone.0299501), 2024-04-11

A

dexamethasone

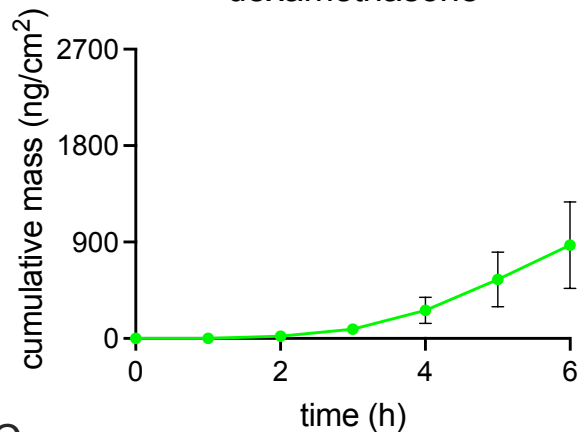

B

diclofenac

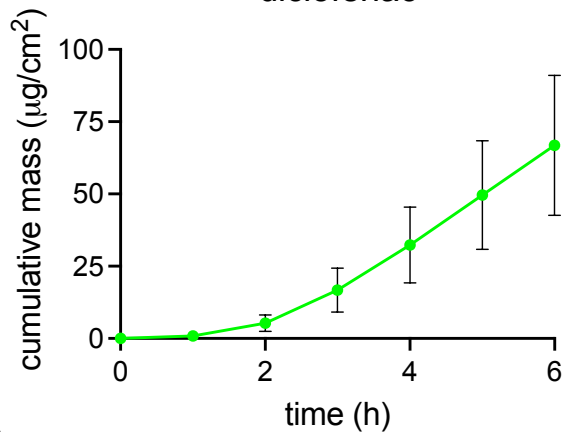

C

indomethacin

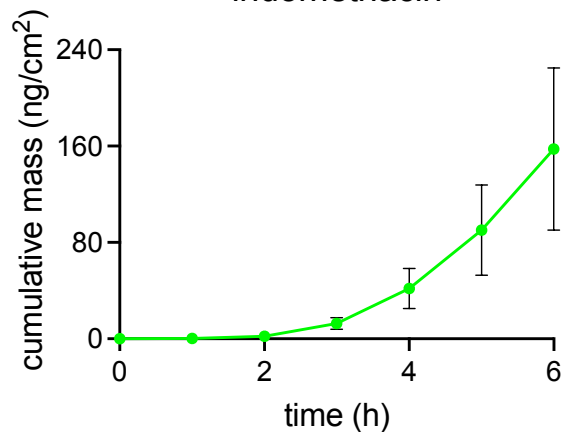

D

piroxicam

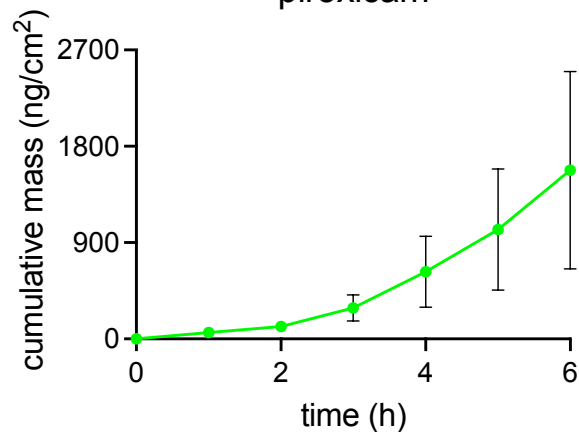

Supplement: pone.0299501.s003.pdf [file pone.0299501.s003.pdf]
