# Supplementary material for: Mathematical modeling of transdermal delivery of topical drug formulations in a dynamic microfluidic diffusion chamber in health and disease
Source: PubMed Central journal article supplement (PMC11008853; doi:10.1371/journal.pone.0299501), 2024-04-11

**A**

psoriasis - VAS - 24h

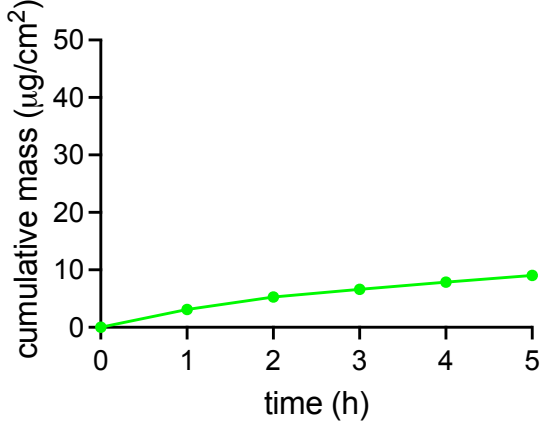**B**

psoriasis - VAS - 96h

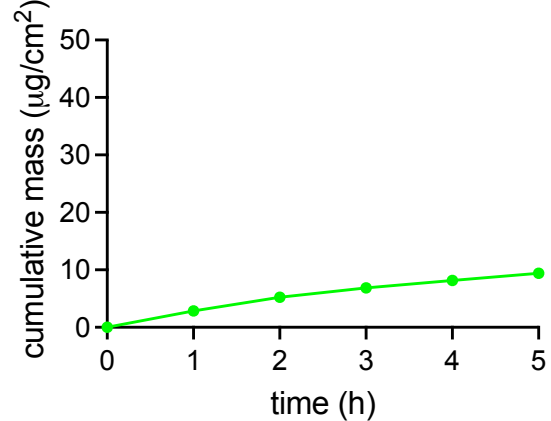**C**

psoriasis - IMQ - 24h

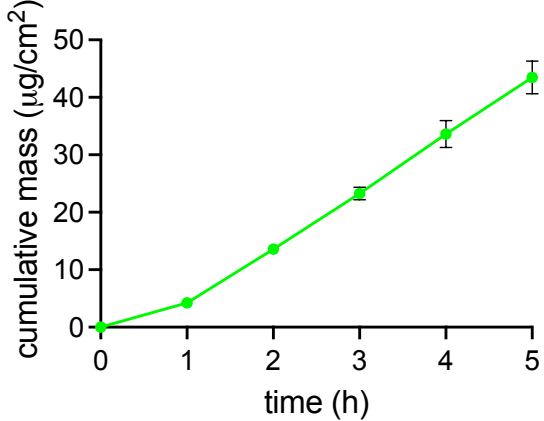**D**

psoriasis - IMQ - 96h

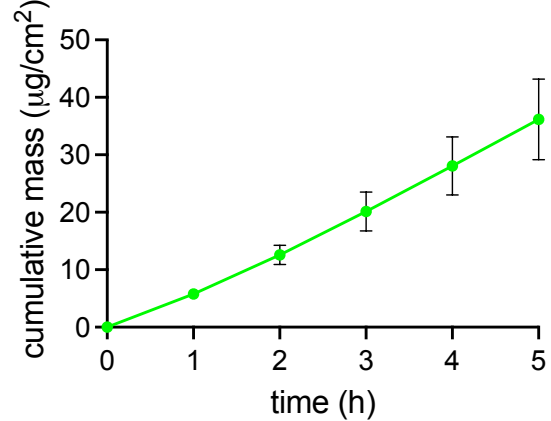

Supplement: pone.0299501.s004.pdf [file pone.0299501.s004.pdf]
