# Supplementary material for: Mathematical modeling of transdermal delivery of topical drug formulations in a dynamic microfluidic diffusion chamber in health and disease
Source: PubMed Central journal article supplement (PMC11008853; doi:10.1371/journal.pone.0299501), 2024-04-11

A

contact dermatitis - acetone

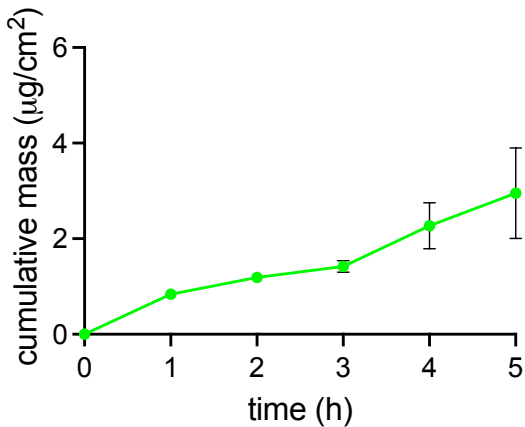

B

contact dermatitis - TNCB

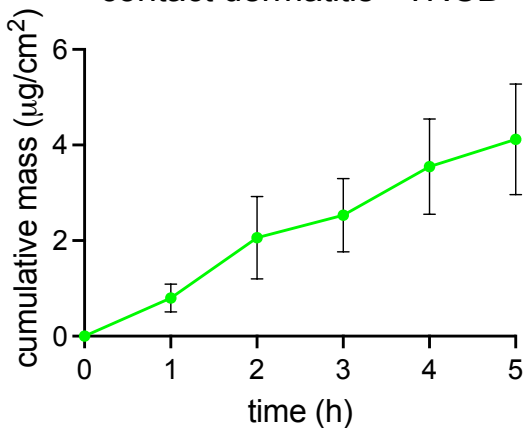

Supplement: pone.0299501.s005.pdf [file pone.0299501.s005.pdf]
